# Supplementary material
Source: PubMed Central journal article supplement (PMC4775984)
Supplement: AAC.01864-15_zac003164938so1.pdf [file AAC.01864-15_zac003164938so1.pdf]

Table S1. PCR typing method for the detection of diverse Tn916-like conjugative transposons

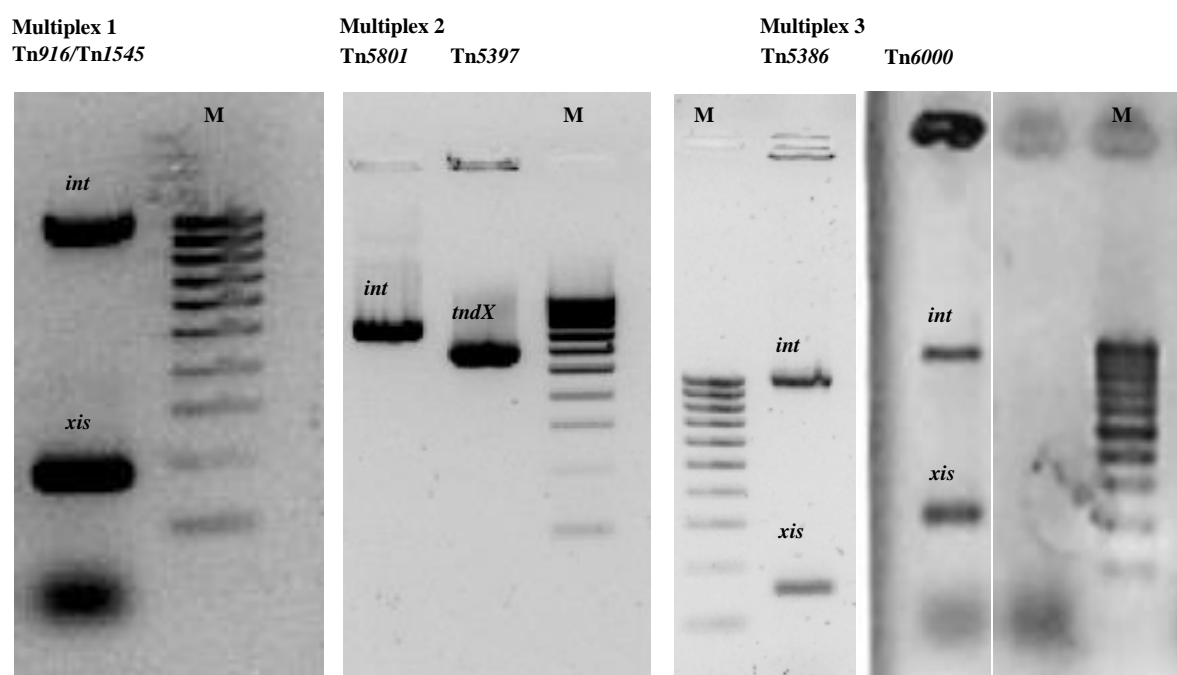

| PCR reaction                     | Primers                          | Sequence (5'-3')      | Amplification conditions                                                             | Amplicon size (bp) | GenBank accession No. | Control isolates                           |            |                                                       |
|----------------------------------|----------------------------------|-----------------------|--------------------------------------------------------------------------------------|--------------------|-----------------------|--------------------------------------------|------------|-------------------------------------------------------|
| <b>Multiplex 1</b><br>Tn916/1545 | Int <sub>916</sub> -F            | GCGTGATTGTATCTCACT    | 95°C- 10'- 1 cycle; 94°C- 30",<br>52°C-30",72°C-30"- 25 cycles;<br>72°C-10'- 1 cycle | 1046               | U09422.1              | <i>E. faecium</i><br>H638466 (this study)  |            |                                                       |
|                                  | Int <sub>916</sub> -R            | GACGCTCCTGTTGCTTCT    |                                                                                      |                    |                       |                                            |            |                                                       |
|                                  | Xi <sub>916</sub> -F             | AAGCAGACTGACATTCCTA   |                                                                                      | 194                |                       |                                            |            |                                                       |
|                                  | Xi <sub>916</sub> -R             | GCGTCCAATGTATCTATAA   |                                                                                      |                    |                       |                                            |            |                                                       |
| <b>Multiplex 2</b><br>Tn5397     | tndX-F                           | ATGATGGGTTGGACAAAGA   | 95°C- 10'- 1 cycle; 94°C- 30",<br>55°C-30",72°C-45"- 25<br>cycles;72°C-10'- 1 cycle  | 611                | AF333235              | <i>E. faecium</i><br>H446511 (this study)  |            |                                                       |
|                                  | tndX-R                           | CTTTGCTCGATAGGCTCTA   |                                                                                      |                    |                       |                                            |            |                                                       |
|                                  | Tn5801<br>Int <sub>5801</sub> -F | CTGTTTCCGATATTGAGC    |                                                                                      | 857                |                       |                                            | AF329848.1 | <i>E. faecium</i><br>E240 (this study;<br>KP001176.1) |
|                                  | Int <sub>5801</sub> -R           | GTTTCGCAAGTAGTCTACAG  |                                                                                      |                    |                       |                                            |            |                                                       |
| <b>Multiplex 3</b><br>Tn6000     | Int <sub>6000</sub> -F           | CATCGAGTCTAACCGATTGT  | 95°C- 10'- 1 cycle; 94°C- 30",<br>55°C-30",72°C-30"- 25 cycles;<br>72°C-10'- 1 cycle | 869                | FN555436.1            | <i>E. faecalis</i><br>C386<br>(JN208881.1) |            |                                                       |
|                                  | Int <sub>6000</sub> -R           | GACCCAAACGAACCTTGACT  |                                                                                      |                    |                       |                                            |            |                                                       |
|                                  | Xi <sub>6000</sub> -F            | CGAAGTATTAACCGAACAGA  |                                                                                      | 203                |                       |                                            |            |                                                       |
|                                  | Xi <sub>6000</sub> -R            | TATCATCGCGATCAAAAACGA |                                                                                      |                    |                       |                                            |            |                                                       |
|                                  | Tn5386<br>Int <sub>5386</sub> -F | CTTGTTCTACGGACAGAGT   |                                                                                      | 1021               |                       |                                            | DQ321786.1 | <i>E. faecium</i><br>DR344R <sup>25</sup>             |
|                                  | Int <sub>5386</sub> -R           | AGCCGTGAGCGTAATAATTC  |                                                                                      |                    |                       |                                            |            |                                                       |
| Xi <sub>5386</sub> -F            | ATACTGATGTGCCTGTATGG             | 155                   |                                                                                      |                    |                       |                                            |            |                                                       |
|                                  | Xi <sub>5386</sub> -R            | TCGCTTTATCTGAATACGG   |                                                                                      |                    |                       |                                            |            |                                                       |

Abbreviations: M, DNA marker- 100bp (Hyperladder IV 100bp-BioRon); *Int*, integrase; *xis*, excisionase, *tndX*, recombinase site-specific resolvase.



|                        |                                     |                                                                                 |   |        |            |   |        |   |                       |        |   |        |          |   |         |         |
|------------------------|-------------------------------------|---------------------------------------------------------------------------------|---|--------|------------|---|--------|---|-----------------------|--------|---|--------|----------|---|---------|---------|
| B 15                   | Sag (4)                             | GBR                                                                             | - | G1420T | -          | - | T6270C | - | Δ8070-8077,<br>T8510C | -      | - | -      | -        | - | -       | -       |
| B 20                   | Sag (1)                             | unk                                                                             | - | -      | -          | - | -      | - | Δ8070-8077            | -      | - | -      | -        | - | -       | -       |
| B 15, B 16, B 17, B 20 | Efm (7), Efs (4), Sag (33), Sth (1) | USA (B20),<br>GBR (B16),<br>BEL (B16),<br>ARG (B15),<br>NOR (B15),<br>unk (B17) | - | -      | G3107T     | - | -      | - | Δ8070-8077            | -      | - | -      | -        | - | -       | -       |
| B 17                   | Sag (1)                             | unk                                                                             | - | -      | Δ2237-2319 | - | -      | - | Δ8070-8077            | -      | - | -      | -        | - | G13370A | -       |
| B 20                   | Sag (1)                             | unk                                                                             | - | -      | -          | - | -      | - | -                     | -      | - | -      | ΔTC11143 | - | -       | A13905G |
| B 19                   | Sag (1)                             | unk                                                                             | - | -      | -          | - | -      | - | Δ8070-8077            | T8953C | - | -      | -        | - | -       | -       |
| B 21                   | Sag (1)                             | USA                                                                             | - | A1668C | Δ2237-2319 | - | -      | - | Δ8070-8077            | -      | - | -      | A10355C  | - | -       | -       |
| B 23                   | Efs (3)                             | GBR, FRA                                                                        | - | -      | -          | - | -      | - | -                     | -      | - | -      | -        | - | -       | -       |
| B 23                   | Efs (2)                             | unk                                                                             | - | -      | -          | - | -      | - | -                     | -      | - | -      | A12056G  | - | -       | -       |
| B 23                   | Efs (1)                             | unk                                                                             | - | -      | -          | - | -      | - | -                     | -      | - | -      | G12537C  | - | -       | -       |
| B 23                   | Efs (2)                             | USA, GBR                                                                        | - | -      | -          | - | C5514T | - | -                     | -      | - | C9645T | -        | - | C12525T | -       |
| B 23                   | Efs (1)                             | USA                                                                             | - | -      | -          | - | -      | - | -                     | -      | - | -      | G10714T  | - | -       | -       |

\*\* The position of each change is given from the alignment of the consensus sequences.

Δ, deletion; IN: insertion;

\*These nucleotide changes are related to variants of type A (B18 is a recombinant variant).

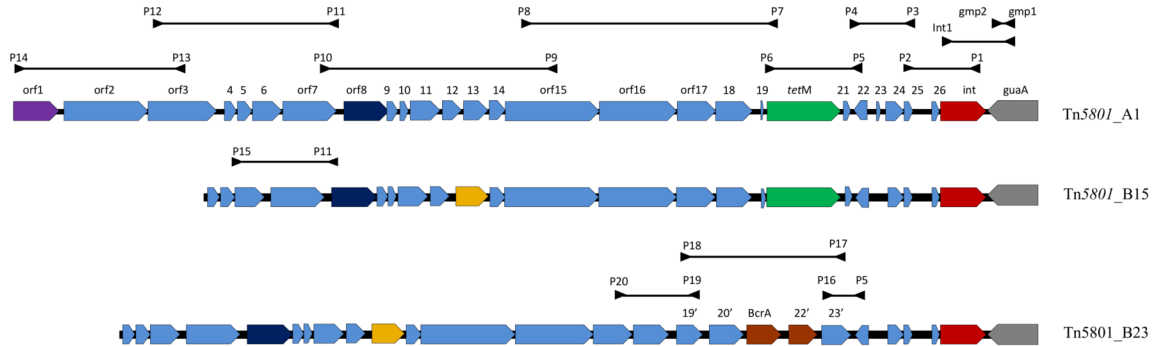

Figure S1

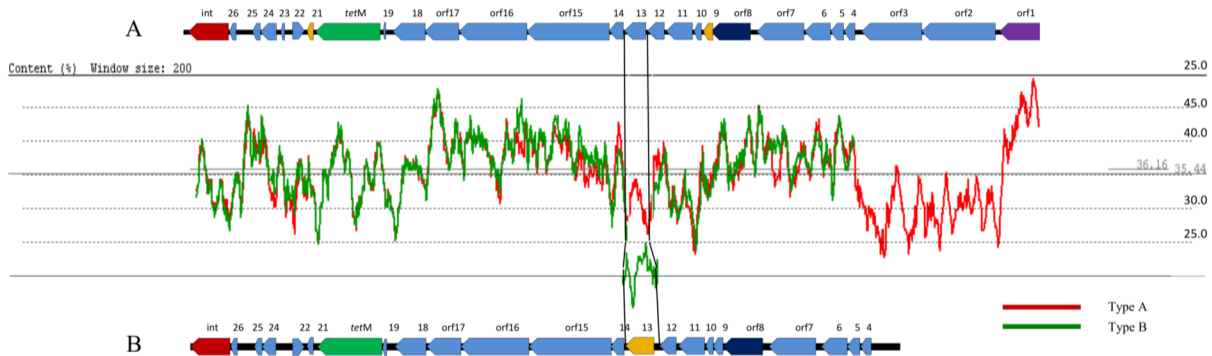

Figure S2

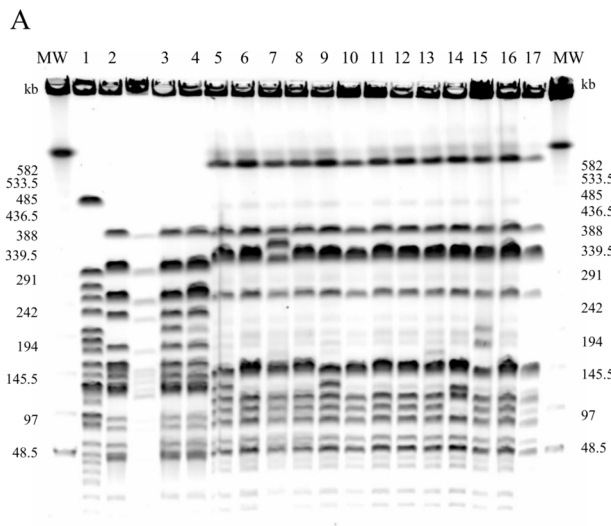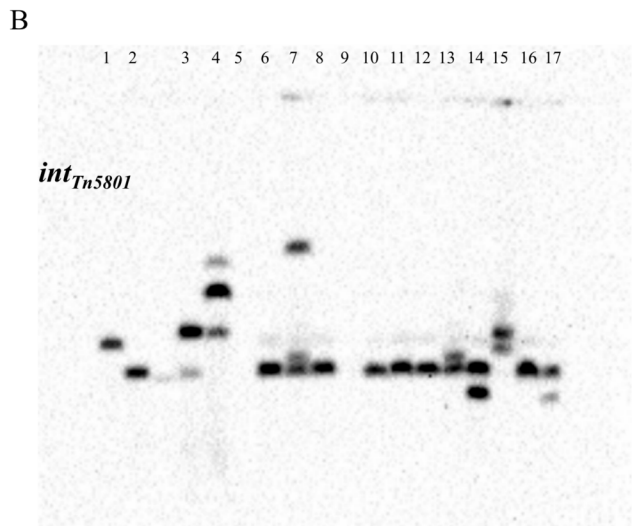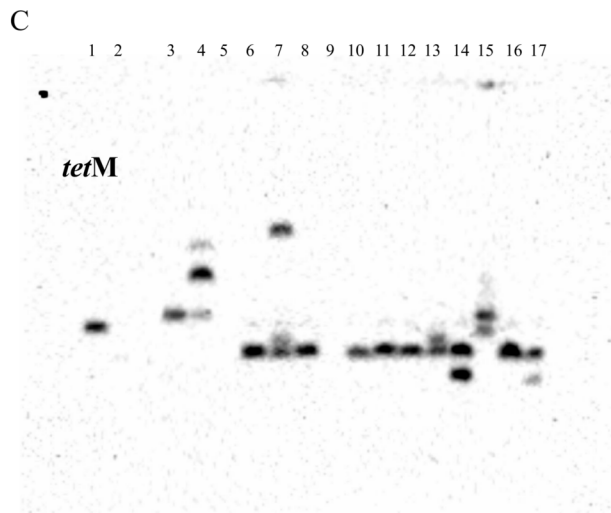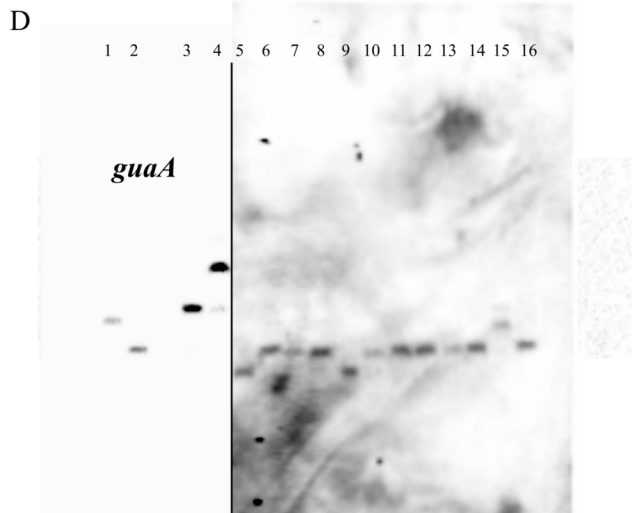

Figure S3

FIG S1. Characterization of Tn5801: PCR strategy.

FIG S2. GC% content of Tn5801 A1 and B15.

FIG S3. Location of Tn5801 markers *int*<sub>Tn5801</sub>, *tet*(M) and *guaA* genes. *Sma*I-PFGE of *E. faecalis* donors, recipients and tranconjugant strains (A); hybridization of *Sma*I digested genomic *E. faecalis* DNA with a *int*<sub>Tn5801</sub>, *tet*(M) and *guaA* probes (panels B, C, D, respectively). Primary transconjugants were represented in lines 3, 4, 10, 11 and 12; and secondary transconjugants in lines 6, 7, 8, 13, 14, 15, 16 and 17. MW= molecular weight marker (PFGE-standard lambda ladder, 48.5–1,000 kb; New England Biolabs); lane 1, Ef1; lane 2, *Efs* strain JH2-2; lane 3, *Efs* strain JH2-2::Tn5801\_1; lane 4, *Efs* strain JH2-2::Tn5801\_2; lane 5, *Efs* strain OG1SS; lane 6, *Efs* strain OG1SS::Tn5801\_1.1; lane 7, *Efs* strain OG1SS::Tn5801\_1.2; lane 8, *Efs* strain OG1SS::Tn5801\_1.3; lane 9, *Efs* strain OG1RF; lane 10, *Efs* strain OG1RF::Tn5801\_1; lane 11, *Efs* strain OG1RF::Tn5801\_2; lane 12, *Efs* strain OG1RF::Tn5801\_3; lane 13, *Efs* strain OG1SS::Tn5801\_2.1; lane 14, *Efs* strain OG1SS::Tn5801\_2.2; lane 15, *Efs* strain OG1SS::Tn5801\_2.3; lane 16, *Efs* strain OG1SS::Tn5801\_2.4; lane 17, *Efs* strain OG1SS::Tn5801\_2.5. Panel D comprises two different hybridization experiments.
